# Supplementary material for: Circulating Thrombomodulin: Release Mechanisms, Measurements, and Levels in Diseases and Medical Procedures
Source: PubMed Central journal article supplement (PMC9273331; doi:10.1055/a-1801-2055), 2022-07-11
Supplement: 10-1055-a-1801-2055-s210080.pdf [file 10-1055-a-1801-2055-s210080.pdf]

**Supplementary Table S1.** List of commercially available ELISA kit for measuring sTM

| Name of kit                                               | Detector antibody                                    | Sample type(s) <sup>a</sup>                                                                                         | Sensitivity <sup>b</sup> | Company       |
|-----------------------------------------------------------|------------------------------------------------------|---------------------------------------------------------------------------------------------------------------------|--------------------------|---------------|
| Thrombomodulin (CD141) human ELISA kit (ab46508)          | Biotinylated antithrombomodulin                      | Cell culture supernatant, serum, plasma                                                                             | 0.31 ng/mL               | Abcam         |
| Human thrombomodulin PicoKine ELISA kit                   | Biotinylated antihuman thrombomodulin                | Cell culture supernatant, serum, plasma (heparin, EDTA, citrate) and urine                                          | <10 pg/mL                | Boster        |
| Human thrombomodulin ELISA kit                            | Biotinylated antihuman thrombomodulin                | NA                                                                                                                  | 41.25 pg/mL              | Biorbyt       |
| TM (CD141) human ELISA Kit                                | Biotinylated antithrombomodulin                      | Cell culture supernatant, plasma, serum                                                                             | < 0.38 ng/mL             | BioVendor     |
| Human TM ELISA kit                                        | Biotinylated antihuman thrombomodulin                | Serum, plasma, cell culture supernatants                                                                            | < 0.31 ng/mL             | Cell Sciences |
| Human thrombomodulin/BDCA-3 DuoSet, 15 plate              | Biotinylated mouse antihuman thrombomodulin antibody | Cell culture supernatant, serum, and plasma                                                                         | 50 ng/mL                 | R&D Systems   |
| Human thrombomodulin ELISA kit (ab214029)                 | HRP-labeled antibody (thrombomodulin conjugate)      | Cell culture extracts, cell culture supernatant, Cit plasma, EDTA plasma, hep plasma, serum, tissue extracts, urine | 3 pg/mL                  | Abcam         |
| Human thrombomodulin/BDCA-3 Quantikine ELISA kit          | HRP-labeled antibody (thrombomodulin conjugate)      | Serum, heparin plasma, cell culture supernates, cell lysates, citrate plasma, EDTA plasma, urine                    | 27 pg/mL                 | R&D Systems   |
| Human thrombomodulin ELISA kit                            | Biotinylated Detection Antibody                      | Serum, plasma and other Biological fluids                                                                           | 37.5 pg/mL               | Abbeva        |
| Human thrombomodulin matched antibody pair kit (ab219526) | Biotinylated detection antibody                      | NA                                                                                                                  | 9.96 pg/mL               | Abcam         |
| THBD (human) ELISA kit                                    | Biotinylated detection antibody                      | Cell culture supernatant, plasma, serum                                                                             | <0.31 ng/mL              | Abnova        |
| Thrombomodulin ELISA kit (human) (OKAC00252)              | Biotinylated detection antibody                      | Cell lysates, plasma, serum                                                                                         | 32 pg/mL                 | Aviva         |
| Human thrombomodulin ELISA kit                            | Biotinylated detection antibody                      | Plasma                                                                                                              | 18.24 pg/mL              | Biomatik      |
| Human CD141/thrombomodulin ELISA set                      | Biotinylated detection antibody                      | Cell supernatants, buffered solutions, serum, plasma and other bodily fluids                                        | <0.31 ng/mL              | Cell Sciences |

Supplementary Table S1. (Continued)

| Name of kit                                 | Detector antibody               | Sample type(s) <sup>a</sup>                                                          | Sensitivity <sup>b</sup> | Company               |
|---------------------------------------------|---------------------------------|--------------------------------------------------------------------------------------|--------------------------|-----------------------|
| Human thrombomodulin ELISA kit              | Biotinylated detection antibody | Serum, plasma, tissue homogenates                                                    | 0.078 ng/mL              | CUSABIO Technology    |
| Human sCD141 ELISA kit                      | Biotinylated detection antibody | Serum, plasma, cell culture                                                          | 0.31 ng/mL               | Eagle Bioscience      |
| Human TM ELISA kit                          | Biotinylated detection antibody | Serum, plasma, cell culture supernatant, tissue, other fluid                         | 37.5 pg/mL               | Elabscience           |
| Human thrombomodulin ELISA kit (GWB-SKR252) | Biotinylated detection antibody | Cell lysates, serum and plasma                                                       | 32 pg/mL                 | GenWay Biotech        |
| Human THBD/CD141/thrombomodulin ELISA kit   | Biotinylated detection antibody | Cell culture supernatants, citrate plasma, EDTA plasma, heparin plasma, serum, urine | 10 pg/mL                 | Life Span BioSciences |
| Human TM (thrombomodulin) ELISA kit         | Biotinylated detection antibody | NA                                                                                   | 37.5 pg/mL               | Nordic BioSite        |
| Human thrombomodulin/BDCA-3 ELISA kit       | Biotinylated detection antibody | Serum, plasma, body fluids, tissue lysate or cell culture supernatant                | 5.0 pg/mL                | Novteinbio            |
| Human thrombomodulin ELISA kit              | Biotinylated detection antibody | Cell culture supernatant, serum, plasma(heparin, EDTA, citrate) and urine            | <10 pg/mL                | OriGene Technologies  |

Abbreviations: ELISA, enzyme-linked immunosorbent assays; NA, not available; sTM, soluble thrombomodulin.

Note: These ELISA kits use biotin- and HRP-labeled anti-TM antibodies or biotin-labeled detection antibodies to detect the sTM in serum, plasma, cell culture supernatant, tissue or other fluids. However, there is no information available related to the antibody specificity to the TM domains for all these ELISA kits.

<sup>a,b</sup>All from the vendor's web site.
